# Supplementary material for: A new lightning scheme in Canada's Atmospheric Model, CanAM5.1: Implementation, evaluation, and projections of lightning and fire in future climates
Source: Copernicus journal article supplement (doi:10.5194/gmd-2024-24), 2024-02-16
Supplement: Supplementary file [file gmd-2024-24-AC1-supplement.pdf]

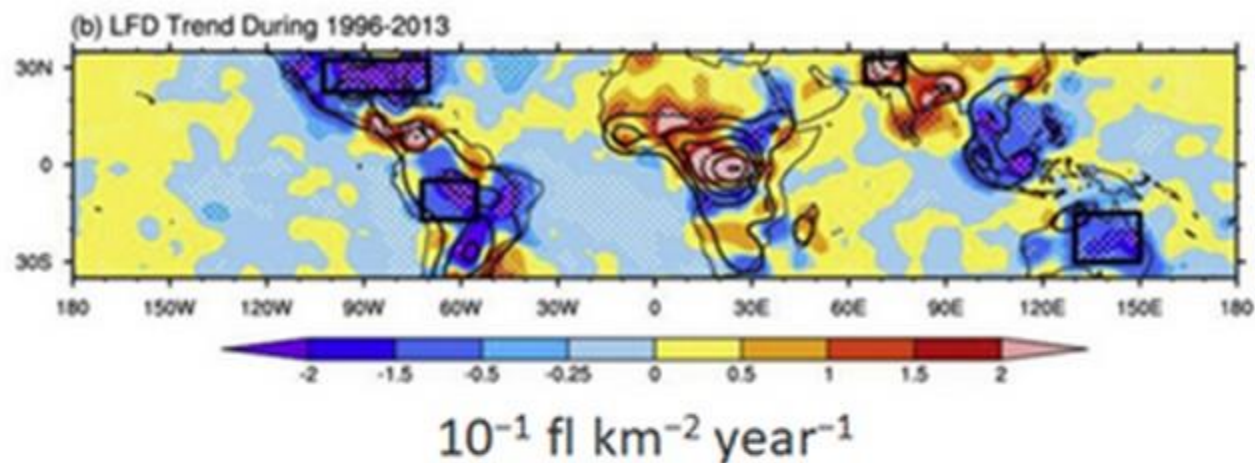

**Fig AR1(a):** Observed lightning trends from LIS from 1996-2013, as shown in Qie et al. "Regional trends of lightning activity in the tropics and subtropics", *Atmos. Res.*, 242(11), 104960, 2020.

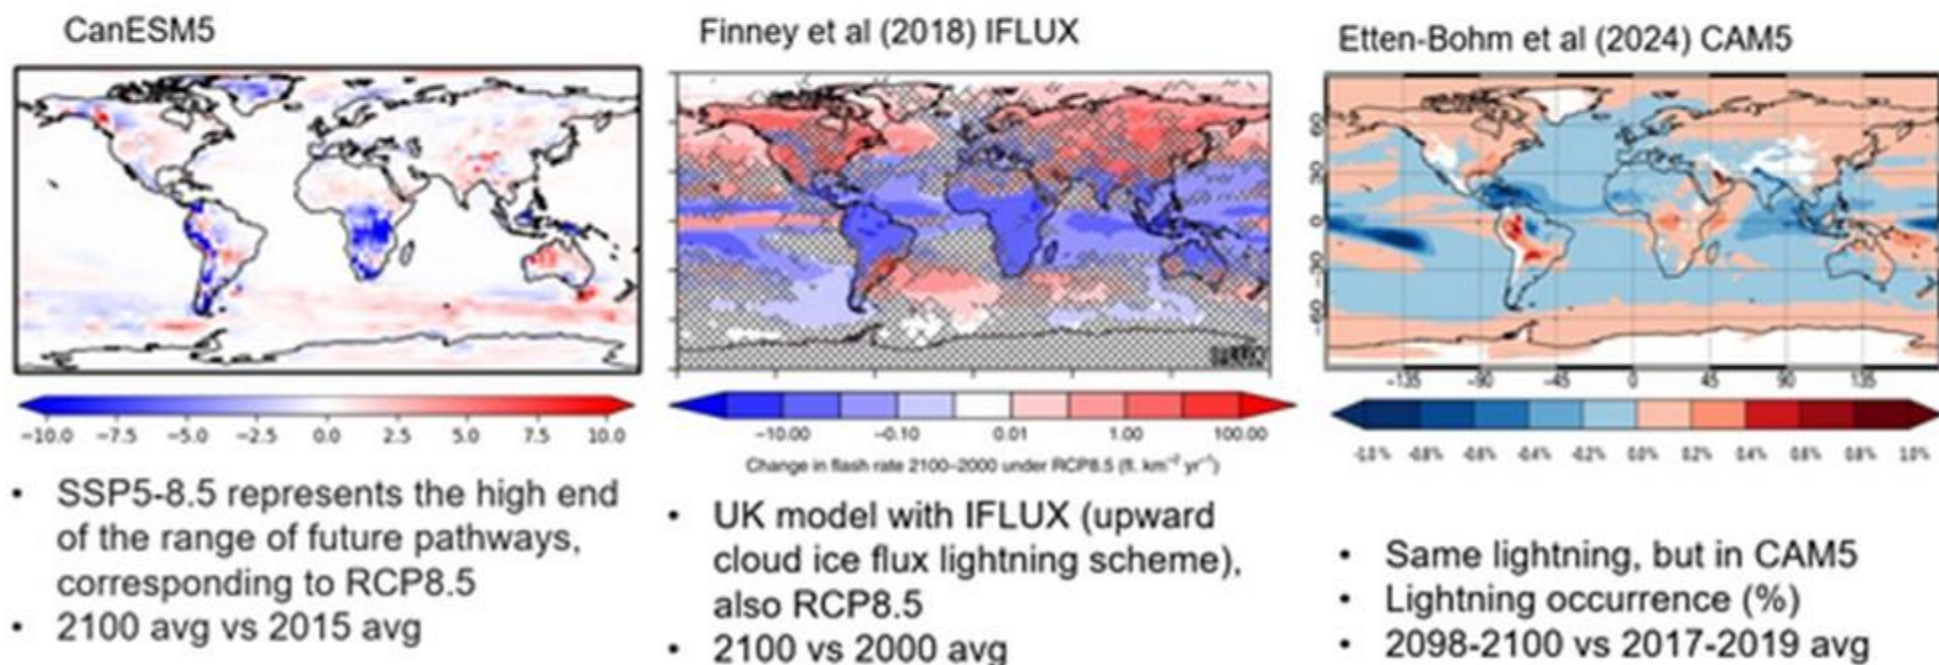

**Fig AR1(b):** future minus present changes in lightning: our study, vs two other studies.
